# Supplementary material for: Development of an Indirect ELISA and Dot-Blot Assay for Serological Detection of Rice Tungro Disease
Source: Hindawi journal article supplement (doi:10.1155/2017/3608042), 2017-01-01
Supplement: f1 [file 3608042.f1.pdf]

**Supplementary Material 1:** The PCR, dot-blot and ELISA results of all the 99 samples tested in this study

| No | Sample ID | RTBV PCR result | RTSV PCR result | Dot blot result | Indirect ELISA result |        |
|----|-----------|-----------------|-----------------|-----------------|-----------------------|--------|
|    |           |                 |                 |                 | Corrected OD value    |        |
|    |           |                 |                 |                 | Average*              | SD     |
| 1  | IP1       | +               | -               | +               | 0.5015                | 0.0276 |
| 2  | IP2       | +               | -               | +               | 0.5070                | 0.0283 |
| 3  | IP3       | +               | + (weak)        | +               | 1.4660                | 0.0382 |
| 4  | IP4       | +               | +               | +               | 0.6295                | 0.0262 |
| 5  | IP5       | +               | +               | +               | 0.7960                | 0.0820 |
| 6  | IP6       | +               | -               | +               | 1.0795                | 0.0516 |
| 7  | IP7       | +               | +               | +               | 1.1035                | 0.1831 |
| 8  | IP8       | +               | -               | -               | 1.1740                | 0.0085 |
| 9  | IP9       | +               | -               | +               | 1.5855                | 0.1221 |
| 10 | IP10      | +               | -               | +               | 1.8130                | 0.1047 |
| 11 | IP11      | +               | + (weak)        | +               | 2.3855                | 0.0969 |
| 12 | IP12      | +               | + (weak)        | +               | 2.4920                | 0.1047 |
| 13 | IP13      | +               | -               | +               | 2.8285                | 0.3981 |
| 14 | IP14      | +               | + (weak)        | +               | 0.5215                | 0.0134 |
| 15 | IP15      | +               | +               | +               | 0.6935                | 0.0955 |
| 16 | IP16      | +               | +               | +               | 0.7695                | 0.0813 |
| 17 | IP17      | +               | -               | +               | 0.8470                | 0.1796 |
| 18 | IP18      | +               | -               | +               | 0.9125                | 0.2821 |
| 19 | IP19      | +               | -               | +               | 1.0525                | 0.1025 |
| 20 | IP20      | +               | -               | +               | 1.1965                | 0.0177 |
| 21 | IP21      | +               | -               | +               | 1.2130                | 0.0806 |
| 22 | IP22      | +               | -               | +               | 1.3445                | 0.0813 |

|    |      |   |          |   |        |        |
|----|------|---|----------|---|--------|--------|
| 23 | IP23 | + | -        | + | 1.5555 | 0.1185 |
| 24 | IP24 | + | -        | + | 2.0150 | 0.1031 |
| 25 | IP25 | + | +        | + | 0.4690 | 0.0707 |
| 26 | IP26 | + | -        | + | 0.6160 | 0.0311 |
| 27 | IP27 | + | +        | + | 0.6940 | 0.0071 |
| 28 | IP28 | + | -        | + | 0.7035 | 0.0007 |
| 29 | IP29 | + | -        | + | 0.7065 | 0.1336 |
| 30 | IP30 | + | -        | + | 0.7510 | 0.0184 |
| 31 | IP31 | + | +        | + | 0.9010 | 0.0057 |
| 32 | IP32 | + | + (weak) | + | 1.2755 | 0.0615 |
| 33 | IP33 | + | +        | + | 1.3490 | 0.0057 |
| 34 | IP34 | + | -        | + | 1.4665 | 0.0304 |
| 35 | IP35 | + | -        | + | 1.4750 | 0.0665 |
| 36 | IP36 | + | -        | + | 1.7465 | 0.2821 |
| 37 | IP37 | + | + (weak) | + | 1.7715 | 0.2623 |
| 38 | IP38 | + | -        | + | 2.7440 | 0.0594 |
| 39 | IP39 | + | -        | + | 2.9545 | 0.0742 |
| 40 | IP40 | + | +        | + | 0.3410 | 0.0269 |
| 41 | HP1  | - | -        | - | 0.2765 | 0.0488 |
| 42 | HP2  | - | -        | - | 0.2965 | 0.0318 |
| 43 | HP3  | - | + (weak) | - | 0.2750 | 0.0750 |
| 44 | HP4  | - | -        | - | 0.2385 | 0.0742 |
| 45 | HP5  | - | -        | - | 0.3085 | 0.1266 |
| 46 | HP6  | - | -        | - | 0.2395 | 0.1096 |
| 47 | HP7  | - | -        | - | 0.3960 | 0.0014 |
| 48 | HP8  | - | -        | - | 0.2890 | 0.0552 |
| 49 | HP9  | - | -        | - | 0.3410 | 0.0594 |

|    |      |   |   |   |        |        |
|----|------|---|---|---|--------|--------|
| 50 | HP10 | - | - | + | 0.3665 | 0.0403 |
| 51 | HP11 | - | - | - | 0.3190 | 0.0891 |
| 52 | HP12 | - | - | - | 0.3560 | 0.0594 |
| 53 | HP13 | - | - | + | 0.2695 | 0.1831 |
| 54 | HP14 | - | - | - | 0.3550 | 0.0113 |
| 55 | HP15 | - | - | - | 0.2360 | 0.0552 |
| 56 | HP16 | - | - | - | 0.3010 | 0.0014 |
| 57 | HP17 | - | - | - | 0.1935 | 0.0078 |
| 58 | HP18 | - | - | + | 0.2285 | 0.0544 |
| 59 | HP19 | - | - | - | 0.2620 | 0.0184 |
| 60 | HP20 | - | - | - | 0.1595 | 0.0304 |
| 61 | HP21 | - | - | - | 0.3590 | 0.0537 |
| 62 | HP22 | - | - | - | 0.3640 | 0.0325 |
| 63 | HP23 | - | - | - | 0.2000 | 0.0622 |
| 64 | HP24 | - | - | - | 0.1925 | 0.0106 |
| 65 | HP25 | - | - | + | 0.2975 | 0.0262 |
| 66 | HP26 | - | - | - | 0.3205 | 0.0262 |
| 67 | HP27 | - | - | - | 0.2590 | 0.0028 |
| 68 | HP28 | - | - | - | 0.2505 | 0.0035 |
| 69 | HP29 | - | - | - | 0.2410 | 0.0396 |
| 70 | HP30 | - | - | - | 0.4525 | 0.1435 |
| 71 | HP31 | - | - | - | 0.4165 | 0.0191 |
| 72 | HP32 | - | - | - | 0.3455 | 0.0771 |
| 73 | HP33 | - | - | - | 0.2785 | 0.0940 |
| 74 | HP34 | - | - | - | 0.3405 | 0.0163 |
| 75 | HP35 | - | - | - | 0.3705 | 0.0262 |

|    |      |   |   |   |        |        |
|----|------|---|---|---|--------|--------|
| 76 | HP36 | - | - | - | 0.3475 | 0.0460 |
| 77 | HP37 | - | - | - | 0.3890 | 0.0283 |
| 78 | HP38 | - | - | - | 0.3000 | 0.0057 |
| 79 | HP39 | - | - | - | 0.1510 | 0.0071 |
| 80 | HP40 | - | - | - | 0.3320 | 0.0354 |
| 81 | HP41 | - | - | + | 0.3915 | 0.0276 |
| 82 | HP42 | - | - | - | 0.2720 | 0.0141 |
| 83 | HP43 | - | - | - | 0.2235 | 0.0148 |
| 84 | HP44 | - | - | - | 0.2665 | 0.0205 |
| 85 | HP45 | - | - | - | 0.2885 | 0.0346 |
| 86 | HP46 | - | - | - | 0.3350 | 0.0325 |
| 87 | HP47 | - | - | - | 0.2215 | 0.0078 |
| 88 | HP48 | - | - | - | 0.2550 | 0.0184 |
| 89 | HP49 | - | - | - | 0.2810 | 0.0750 |
| 90 | HP50 | - | - | - | 0.4695 | 0.0346 |
| 91 | HP51 | - | - | - | 0.5275 | 0.0219 |
| 92 | HP52 | - | - | + | 0.3015 | 0.1379 |
| 93 | HP53 | - | - | - | 0.2850 | 0.0042 |
| 94 | HP54 | - | - | - | 0.3310 | 0.0042 |
| 95 | HP55 | - | - | - | 0.2770 | 0.0283 |
| 96 | HP56 | - | - | - | 0.3105 | 0.0573 |
| 97 | HP57 | - | - | - | 0.2445 | 0.0460 |
| 98 | HP58 | - | - | + | 0.3920 | 0.0509 |
| 99 | HP59 | - | - | + | 0.4525 | 0.0361 |

IP = infected plant sample; HP = healthy plant sample; + = positive result; - = negative result; \* = Average of two corrected OD values

Note:

1. Based on RTBV PCR as described by Dasgupta et al, 1996.

2. Combination of RTSV PCR done based on Perisamy et al, 2006 and in-house primer set (unpublished)

All the samples were tested by the three different assays. The results from the dot-blot and ELISA were compared to the result from the established PCR assay. The data generated from this table were used to tabulate the 2x2 table (Table 1 and Table 3) shown in the main manuscript. The OD from the ELISA was expressed as an average from a duplicate test.

**Supplementary Material 2:** The RTBV and RTSV PCR results using published and in-house designed primer sets.

RTBV PCR

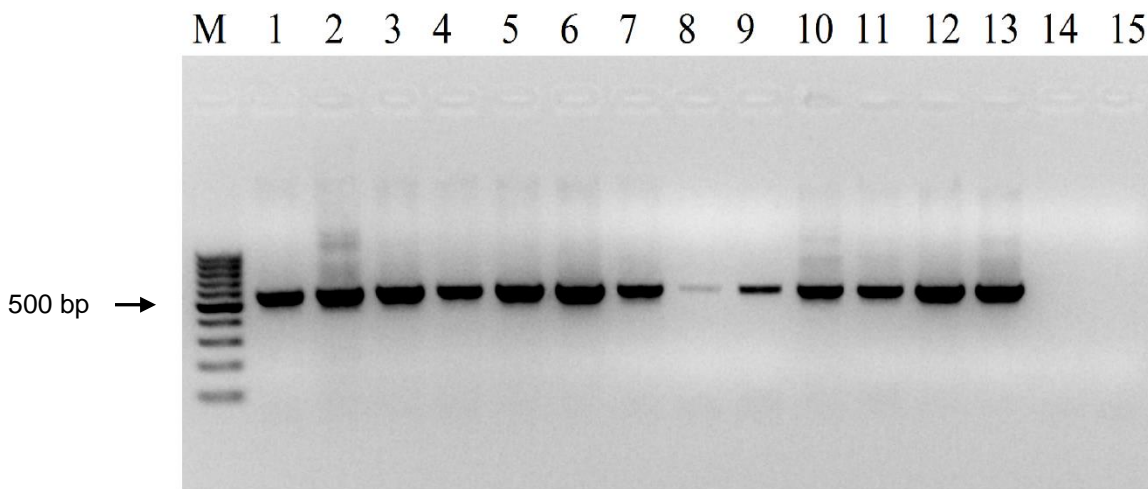

(a)

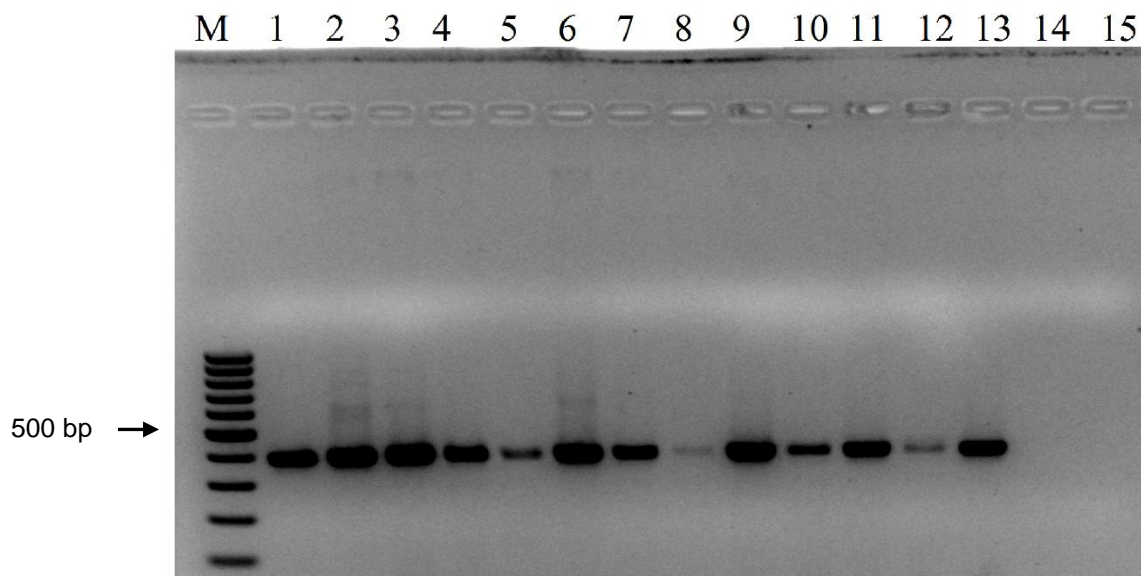

(b)

**Figure 1:** Agarose gel electrophoresis analysis of PCR products to detect RTBV amplified using (a) modified method from Dasgupta *et al.* (1996) (b) in-house designed primers to ORF1 region; ~ 400 bp (unpublished primers). Lane M: 100 bp DNA marker (Thermo Scientific); Lane 1 to 12: samples (representative of the twelve first samples as listed in Supplementary Material 1); Lane 13: Positive control (infected TN1 lysate); Lane 14: Negative control (Healthy TN1); Lane 15: water control.

## RTSV PCR

We tested the multiplex PCR from Periasamy *et al.* (2006) and only RTBV was amplified. We also tested the RTSV primers from Periasamy *et al.* (2006) in a single RTSV amplification and obtained inconsistent results as shown in the Figure 2 below where RTSV PCR was conducted on infected samples. In addition, we obtained multiple bands besides the targeted band at approximately 1.1 kbp as mentioned by Periasamy *et al.* (2006). Thus, we design our own in-house primer set (unpublished primer) to re-attempt the RTSV PCR and although with this set of primer a single band was observed at the expected size (700 bp) the sensitivity is still lower than the RTBV PCR.

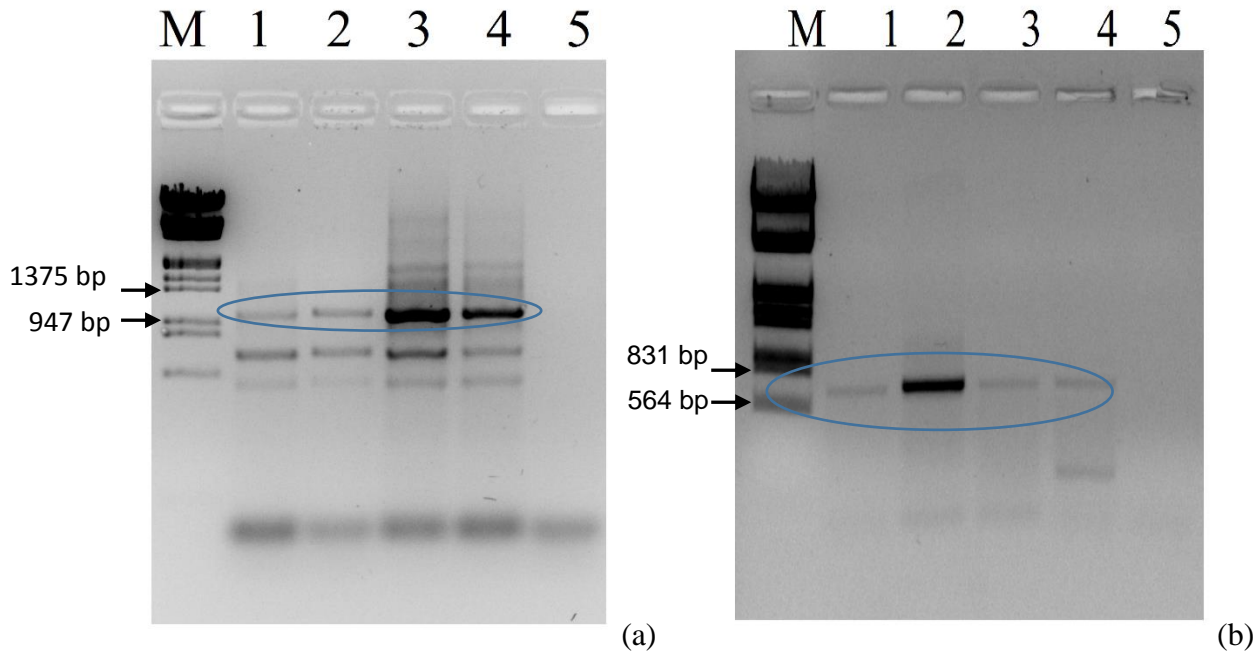

**Figure 2:** Agarose gel electrophoresis analysis of PCR products to detect RTSV amplified using (a) modified method from Perisamy *et al.* (2006) (b) in-house designed primers (to CP1 and CP2 regions of RTSV; ~700 bp). Lane M: Lambda DNA/ Eco R1/ Hind III marker (Thermo Scientific); Lane 1 to 4: Infected samples (representative of the first 4 samples as listed in Additional File 1); Lane 5: water control

#### References:

1. Dasgupta I, Das BK, Nath PS, Mukhopadhyay S, Niazi FR, Varmac A. Detection of rice tungro bacilliform virus in field and glasshouse samples from India using the polymerase chain reaction. *J Virol Methods.* 1996; 58: 53-58.
2. Periasamy M, Niazi FR, Malathi VG. Multiplex RT-PCR, a novel technique for the simultaneous detection of the DNA and RNA viruses causing rice tungro disease. *J Virol Methods.* 2006; 134: 230-236.
